# Supplementary material for: Circulatory lipid signature in response to short-term testosterone gel treatment of healthy young females
Source: Springer Nature journal article supplement (doi:10.1038/s41598-025-92690-6), 2025-03-29
Supplement: MOESM2 [file 41598_2025_92690_MOESM2_ESM.pdf]

## **Supplementary data**

### **Lipidomic Analysis of Healthy Women: Effects of Testosterone Gel Administration**

#### **Table of contents**

**Figure S1** – From initial screen to quantitative data and statistical analyses

**Figure S2** – Hierarchical cluster of subjects according to their circulatory lipid levels

**Figure S3** – Inter-subject coefficient of variation for each lipid subclass in function of the time points of the study.

**Table S1** – SRM list for acylcarnitines added in the method

**Table S2** – SRM list of additional phospholipids added in the method

**Table S3** – Subject data demographics

**Table S4** – Steroid concentrations

**Table S5** - Subclass sum composition

**Table S6** – GLS output

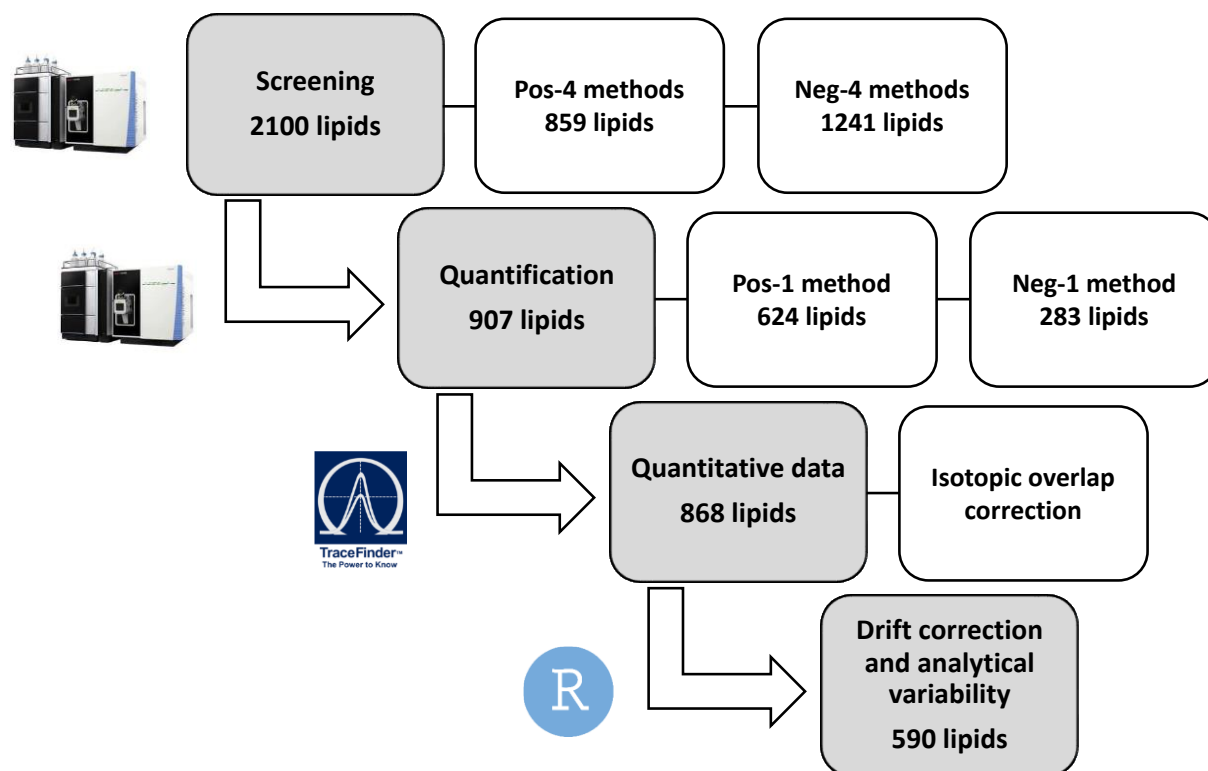

**Figure S1.** From initial screen to quantitative data and statistical analyses to investigate the effect of testosterone administration on the plasma lipidome.

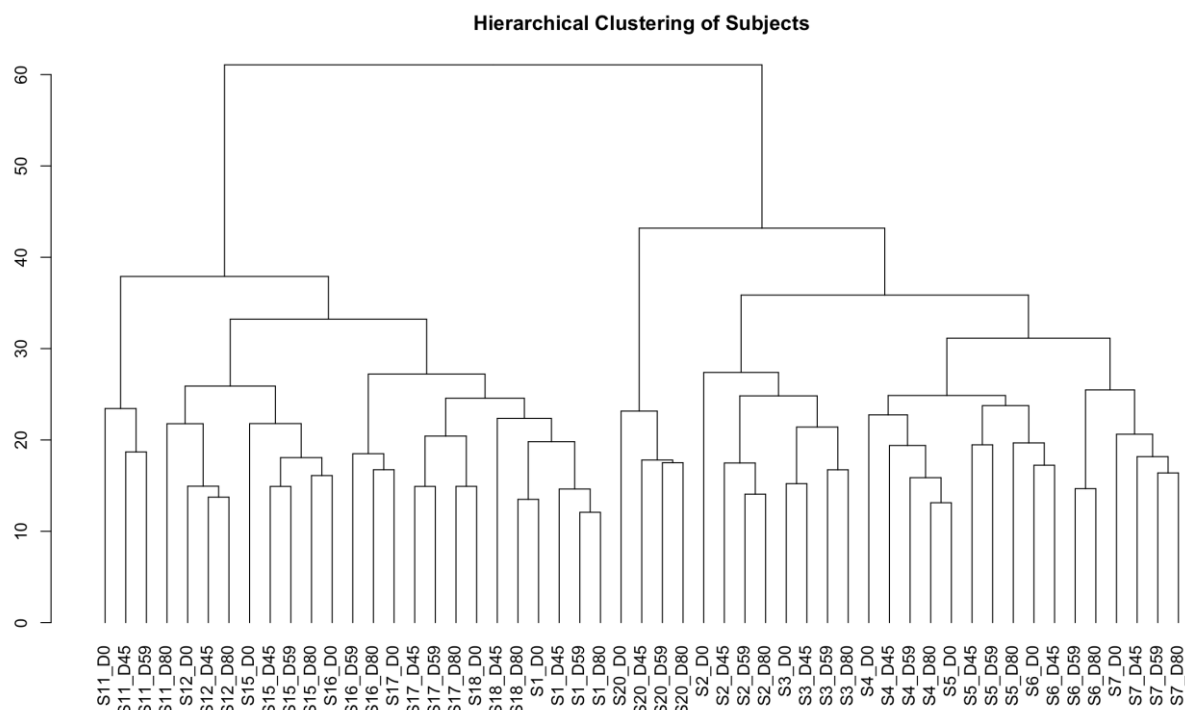

**Figure S2.** Hierarchical clustering of the subjects using lipid data.

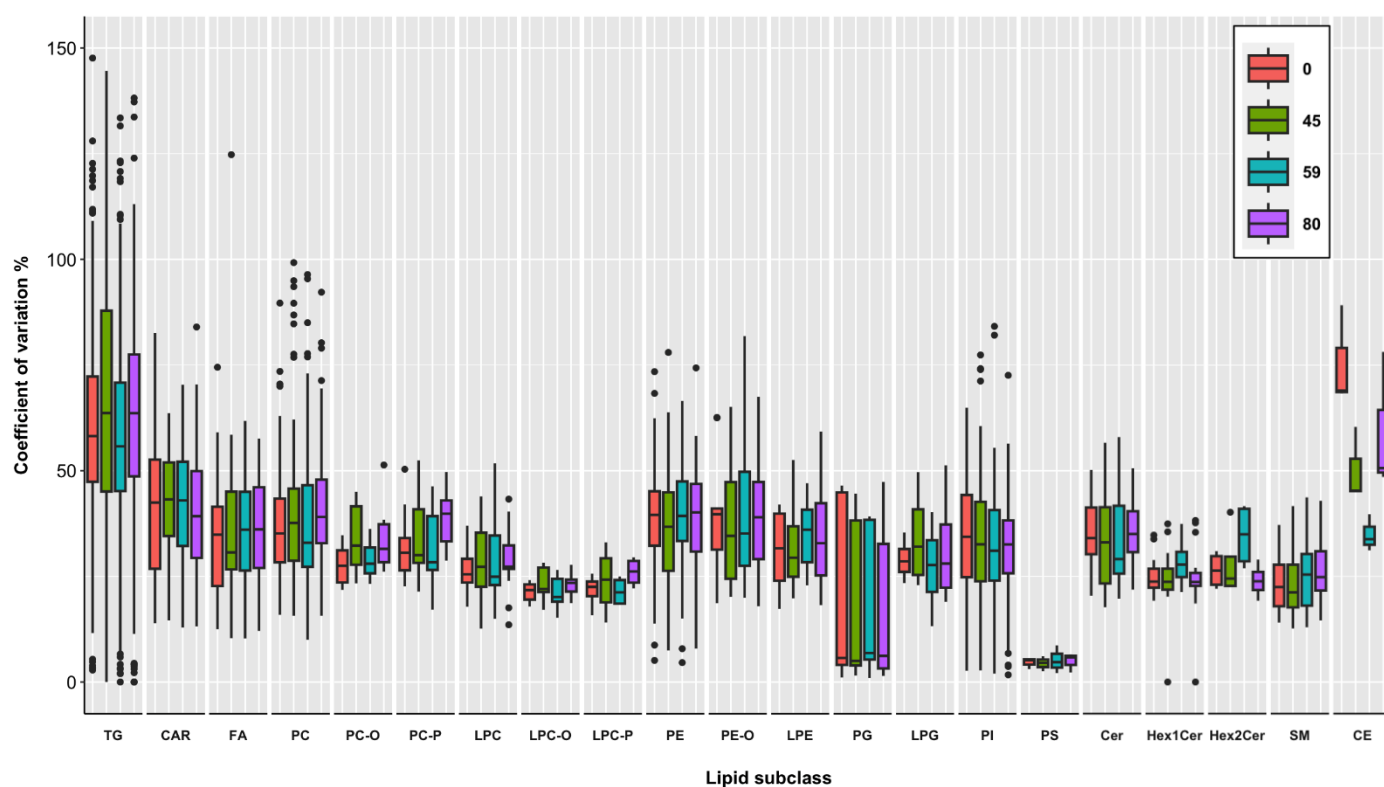

**Figure S3.** Inter-subject coefficient of variation for each lipid subclass in function of the time points of the study.
